# Supplementary material for: Phosphines-Nitrogen-Phosphines chelated CoCl2 is a novel therapeutic agent for pancreatic cancer
Source: Research Square preprint supplement (doi:10.21203/rs.3.rs-6476256/v1), 2025-04-21
Supplement: Supplementary file 1 [file Supplementary Table S1.xlsx]

## Sheet: Sheet1
mIl1b-qPCR-F	AGTTGACGGACCCCAAA
mIl1b-qPCR-R	TCTTGTTGATGTGCTGCTG
mIl6-qPCR-F	CTGCAAGAGACTTCCATCCAG
mIl6-qPCR-R	AGTGGTATAGACAGGTCTGTTGG
mIfnb-qPCR-F	TCCGAGCAGAGATCTTCAGGAA
mIfnb-qPCR-R	TGCAACCACCACTCATTCTGAG
mIsg15-qPCR-F	GGTGTCCGTGACTAACTCCAT
mIsg15-qPCR-R	TGGAAAGGGTAAGACCGTCCT
hIFNB-qPCR-F	GCTTGGATTCCTACAAAGAAGCA
hIFNB-qPCR-R	ATAGATGGTCAATGCGGCGTC
mNos2-qPCR-F	GTTCTCAGCCCAACAATACAAGA
mNos2-qPCR-R	GTGGACGGGTCGATGTCAC
mPtgs2-qPCR-F	TTCAACACACTCTATCACTGGC
mPtgs2-qPCR-R	AGAAGCGTTTGCGGTACTCAT
mCxcl10-qPCR-F	CCAAGTGCTGCCGTCATTTTC
mCxcl10-qPCR-R	GGCTCGCAGGGATGATTTCAA
mTnf-qPCR-F	CGCTGAGGTCAATCTGC
mTnf-qPCR-R	GGCTGGGTAGAGAATGGA
hISG15-qPCR-F	CGCAGATCACCCAGAAGATCG
hISG15-qPCR-R	TTCGTCGCATTTGTCCACCA
mIfna4-qPCR-F	GTTCCAGAAGGCTCAAGCCATC
mIfna4-qPCR-R	TAGGAGGCTCTGTTCCCAAGCA
mIl1a-qPCR-F	CGAAGACTACAGTTCTGCCATT
mIl1a-qPCR-R	GACGTTTCAGAGGTTCTCAGAG
mIfit3-qPCR-F	GTGCAACCAGGTCGAACATT
mIfit3-qPCR-R	CCTTGCTTTCGCCATCTAGG
mCsf1-qPCR-F	AGGAGGATCAGCAAGTGAGG
mCsf1-qPCR-R	AGCAGGTGGAAGACAGACTC
mCsf2-qPCR-F	GCATTGTGGTCTACAGCCTC
mCsf2-qPCR-R	TGTCATCCAGGAGGTTCAGG
mCsf3-qPCR-F	AGCCCCAGGTAATTTCCTCC
mCsf3-qPCR-R	TTGAGCCATGGATTCTGGGT
mStat1-qPCR-F	ATGTCTCGTTTGCGACCATC
mStat1-qPCR-R	TCCAGAGAAAAGCGGCTGTA
mSyk-qPCR-F	TGGAAGAGAGCAACTTTGTGC
mSyk-qPCR-R	TGGAAAGACCGAAATCGCTG
