# Supplementary material for: Phosphines-Nitrogen-Phosphines chelated CoCl2 is a novel therapeutic agent for pancreatic cancer
Source: Research Square preprint supplement (doi:10.21203/rs.3.rs-6476256/v1), 2025-04-21
Supplement: Supplementary file 6 [file Supplementary Table S2.xlsx]

## Sheet: Sheet1
primer name	primer sequnce
Stat1-shRNA-F1	CCGGGAACAGAAATACACCTACGAACTCGAGTTCGTAGGTGTATTTCTGTTCTTTTTG
Stat1-shRNA-R1	AATTCAAAAAGAACAGAAATACACCTACGAACTCGAGTTCGTAGGTGTATTTCTGTTC
Stat1-shRNA-F2	CCGGCCCTGAAGTATCTGTATCCAACTCGAGTTGGATACAGATACTTCAGGGTTTTTG
Stat1-shRNA-R2	AATTCAAAAACCCTGAAGTATCTGTATCCAACTCGAGTTGGATACAGATACTTCAGGG
Stat1-shRNA-F3	CCGGCGACAGTATGATGAACACAGTCTCGAGACTGTGTTCATCATACTGTCGTTTTTG
Stat1-shRNA-R3	AATTCAAAAACGACAGTATGATGAACACAGTCTCGAGACTGTGTTCATCATACTGTCG
Syk-shRNA-F1	CCGGGCAGGCCATCATCAGTCAGAACTCGAGTTCTGACTGATGATGGCCTGCTTTTTG
Syk-shRNA-R1	AATTCAAAAAGCAGGCCATCATCAGTCAGAACTCGAGTTCTGACTGATGATGGCCTGC
Syk-shRNA-F2	CCGGCGACAAAGACAAGACAGGGAACTCGAGTTCCCTGTCTTGTCTTTGTCGTTTTTG
Syk-shRNA-R2	AATTCAAAAACGACAAAGACAAGACAGGGAACTCGAGTTCCCTGTCTTGTCTTTGTCG
Syk-shRNA-F3	CCGGCGGGTGGAATAATCTCAAGAACTCGAGTTCTTGAGATTATTCCACCCGTTTTTG
Syk-shRNA-R3	AATTCAAAAACGGGTGGAATAATCTCAAGAACTCGAGTTCTTGAGATTATTCCACCCG
Syk-KO-F1	CACCGCUGAAGGGGUGCAGACAUGG
Syk-KO-R1	AAACCCATGTCTGCACCCCTTCAGC
Syk-KO-F2	CACCGUGAAGGGGUGCAGACAUGGC
Syk-KO-R2	AAACGCCATGTCTGCACCCCTTCAC
Syk-KO-F3	CACCGAGACAUGGCGGGAAGUGCUG
Syk-KO-R3	AAACCAGCACTTCCCGCCATGTCTC
